# Supplementary material for: Light-induced saturation change in the angle-independent structural coloration of colloidal amorphous arrays
Source: Royal Society of Chemistry journal article supplement (doi:10.1039/c3tc31438c), 2013-10-30
Supplement: c3tc31438c.pdf [file c3tc31438c.pdf]

Supporting Information

**Light-induced Saturation Change in the  
Angle-independent Structural Coloration of Colloidal  
Amorphous Arrays**

**Ryoko Hirashima,<sup>a</sup> Takahiro Seki,<sup>a</sup> Kiyofumi Katagiri,<sup>b</sup> Yuki  
Akuzawa,<sup>a</sup> Tsukasa Torimoto,<sup>a</sup> and Yukikazu Takeoka\*<sup>a</sup>**

<sup>a</sup>*Graduate School of Engineering, Nagoya University, Furo-cho, Chikusa-ku, Nagoya, 464-8603, Japan*

<sup>b</sup>*Department of Applied Chemistry, Graduate School of Engineering, Hiroshima University, 1-4-1,  
Kagamiyama, Higashi-Hiroshima 739-8527, Japan*

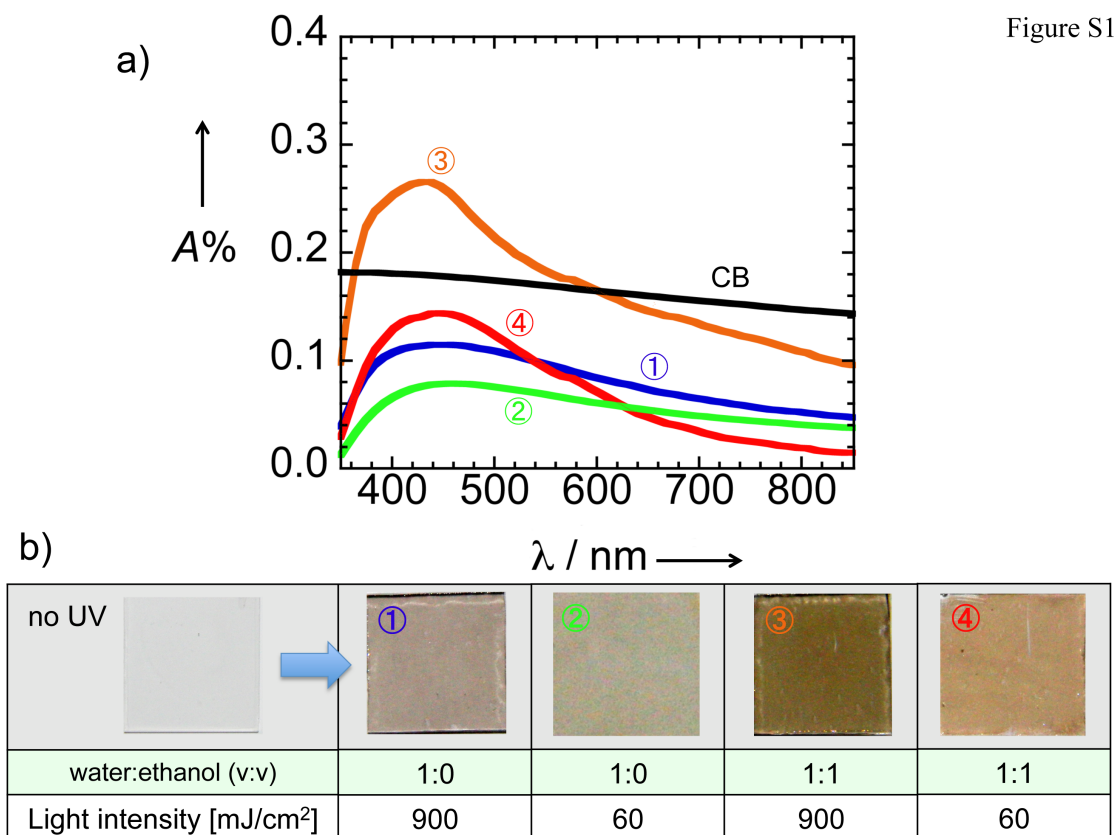

**Figure S1.** a) Absorption spectra of thin membranes composed of titanium oxide particles soaked with silver nitrate solutions (1 mol/L) with different solvent conditions after irradiation with different intensities of 313-nm UV light using a bandpass filter. In the case of a 1:1 water-ethanol mixed solvent, the absorption at the lower wavelength of TiO<sub>2</sub>-Ag particle composite membranes became stronger. In contrast, the TiO<sub>2</sub>-Ag particle composite membranes prepared using an aqueous solution absorbed visible light relatively uniformly across the entire visible region. The absorption spectrum of a carbon black dispersed solution is presented for comparison. b) Optical images of thin membranes composed of titanium oxide particles soaked with silver nitrate solutions before and after being irradiated with 313-nm UV light passed through a bandpass filter.

Figure S2

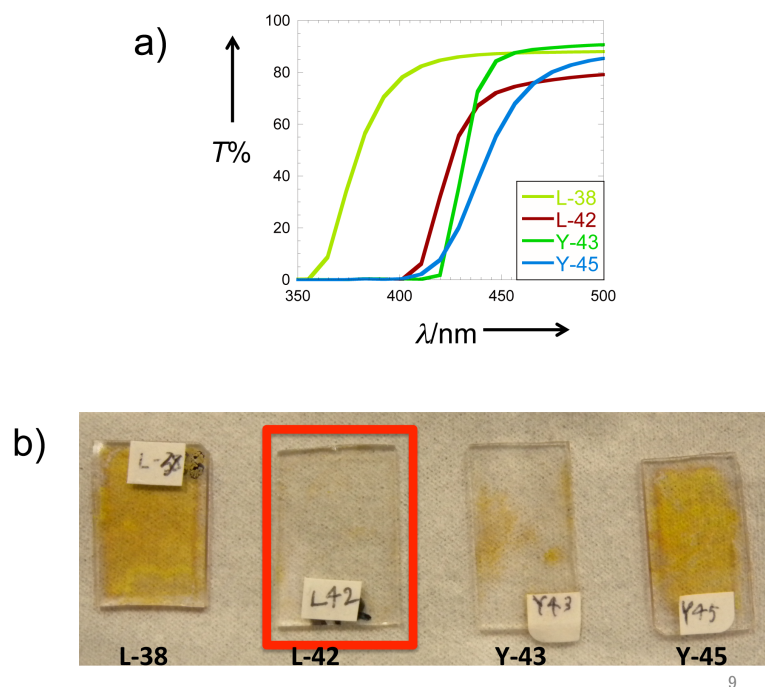

**Figure S2.** a) Transmittance spectra of the various cutoff filters. b) Optical images of the thin membranes composed of titanium oxide particles after the irradiation of the  $\text{TiO}_2$ -Ag particle composite membranes with visible light using these cutoff filters.
